# Supplementary material for: Lactobacilli in COVID-19: A Systematic Review Based on Next-Generation Sequencing Studies
Source: MDPI journal article supplement (doi:10.3390/microorganisms12020284), 2024-01-29
Supplement: s1 [file s1]

## Supplement S1

### Search strategy to PubMed/MEDLINE:

(COVID-19[mh] OR COVID19[tw] OR 2019 Novel Coronavirus Disease[tw] OR 2019 Novel Coronavirus Infection[tw] OR COVID-19 Pandemic\*[tw] OR COVID-19 Virus Disease[tw] OR COVID-19 Virus Infection[tw] OR Coronavirus Disease 2019[tw] OR Coronavirus Disease-19[tw] OR SARS Coronavirus 2 Infection[tw] OR SARS-CoV-2 Infection[tw] OR SARS Coronavirus 2[tw] OR SARS-CoV-2 Virus[tw] OR Severe Acute Respiratory Syndrome Coronavirus 2 Infection[tw] OR SARS-CoV-2[mh] OR 2019 Novel Coronavirus[tw] OR COVID-19 Virus[tw] OR COVID19 Virus[tw] OR Coronavirus Disease 2019 Virus[tw] OR Severe Acute Respiratory Syndrome Coronavirus 2[tw] OR Wuhan Coronavirus[tw] OR coronavirus[tw]) AND (Lactobacillus[mh] OR Lactobacillus[tw])

Filter: Publication data: 2020/01/01 to 2023/08/07

### Search strategy to EMBASE:

('coronavirus disease 2019'/exp OR 'coronavirus disease 2019':ti,ab,kw OR '2019 Novel Coronavirus Disease':ti,ab,kw OR '2019 Novel Coronavirus Infection':ti,ab,kw OR 'COVID-19 Pandemic\*':ti,ab,kw OR 'COVID-19 Virus Disease':ti,ab,kw OR 'COVID-19 Virus Infection':ti,ab,kw OR 'Coronavirus Disease 2019':ti,ab,kw OR 'Coronavirus Disease-19':ti,ab,kw OR 'SARS Coronavirus 2 Infection':ti,ab,kw OR 'SARS-CoV-2 Infection':ti,ab,kw OR 'SARS Coronavirus 2':ti,ab,kw OR 'SARS-CoV-2 Virus':ti,ab,kw OR 'Severe Acute Respiratory Syndrome Coronavirus 2 Infection':ti,ab,kw OR 'Severe acute respiratory syndrome coronavirus 2'/exp OR '2019 Novel Coronavirus':ti,ab,kw OR 'COVID-19 Virus':ti,ab,kw OR 'COVID19 Virus':ti,ab,kw OR 'Coronavirus Disease 2019 Virus':ti,ab,kw OR 'Severe Acute Respiratory Syndrome Coronavirus 2':ti,ab,kw OR 'Wuhan Coronavirus':ti,ab,kw OR 'coronavirus':ti,ab,kw) AND (Lactobacillus/exp OR Lactobacillus:ti,ab,kw)

Filter: Years: 2020-2023

### Search strategy to Scopus:

TITLE-ABS("coronavirus disease 2019" OR "2019 Novel Coronavirus Disease" OR "2019 Novel Coronavirus Infection" OR "COVID-19 Pandemic\*" OR "COVID-19 Virus Disease" OR "COVID-19 Virus Infection" OR "Coronavirus Disease 2019" OR "Coronavirus Disease-19" OR "SARS Coronavirus 2 Infection" OR "SARS-CoV-2 Infection" OR "SARS Coronavirus 2" OR "SARS-CoV-2 Virus" OR "Severe Acute Respiratory Syndrome Coronavirus 2 Infection" OR "Severe acute respiratory syndrome coronavirus 2" OR "2019 Novel Coronavirus" OR "COVID-19 Virus" OR "COVID19 Virus" OR "Coronavirus Disease 2019 Virus" OR "Severe Acute Respiratory Syndrome Coronavirus 2" OR "Wuhan Coronavirus" OR coronavirus) AND TITLE-ABS(Lactobacillus)

Filter: Years: 2019 to 2023

### Search strategy to Web of Science:

(COVID-19 OR 2019 Novel Coronavirus Disease OR 2019 Novel Coronavirus Infection OR COVID-19 Pandemic\* OR COVID-19 Virus Disease OR COVID-19 Virus Infection OR Coronavirus Disease 2019 OR Coronavirus Disease-19 OR SARS Coronavirus 2 Infection OR SARS-CoV-2 Infection OR SARS Coronavirus 2 OR SARS-CoV-2 Virus OR Severe Acute Respiratory Syndrome Coronavirus 2 Infection OR SARS-CoV-2 OR 2019 Novel Coronavirus OR COVID-19 Virus OR COVID19 Virus OR Coronavirus Disease 2019 Virus OR Severe Acute Respiratory Syndrome Coronavirus 2 OR Wuhan Coronavirus OR coronavirus) AND (Lactobacillus)

Publication data: 2020, 2021, 2022, 2023

### Quality assessment - Joanna Briggs Institute's critical appraisal tools

| Cross-sectional             |    |    |    |    |    |    |    |    |       |          |
|-----------------------------|----|----|----|----|----|----|----|----|-------|----------|
| Study                       | Q1 | Q2 | Q3 | Q4 | Q5 | Q6 | Q7 | Q8 | Total | Quality  |
| Jiang, Z., et al.; 2023     | U  | N  | Y  | Y  | N  | NA | Y  | Y  | 4     | Moderate |
| Soffritti, I., et al.; 2021 | Y  | Y  | Y  | Y  | Y  | U  | Y  | Y  | 7     | High     |

Note: It was categorized as "Low" when the study obtained up to three "Yes" answers to the evaluated items; "Moderate" when the study obtained five or six "Yes" answers; and "High" when the study reached seven or more "Yes" answers.

| Case-control              |    |    |    |    |    |    |    |    |    |     |       |          |
|---------------------------|----|----|----|----|----|----|----|----|----|-----|-------|----------|
| Study                     | Q1 | Q2 | Q3 | Q4 | Q5 | Q6 | Q7 | Q8 | Q9 | Q10 | Total | Quality  |
| Gaibani, P., et al.; 2021 | Y  | N  | U  | Y  | NA | N  | NA | Y  | Y  | Y   | 5     | Moderate |
| Maeda, Y.: et al.; 2022   | Y  | Y  | U  | Y  | U  | N  | NA | Y  | Y  | Y   | 6     | Moderate |
| Wu, Y.J., et al.; 2021    | Y  | U  | U  | Y  | U  | N  | NA | Y  | Y  | Y   | 5     | Moderate |
| Yeoh, Y.K. et al.         | Y  | Y  | U  | Y  | U  | Y  | Y  | Y  | Y  | Y   | 8     | High     |

Note: It was categorized as “Low” when the study obtained up to 4 “Yes” answers for the evaluated items; “Moderate” when the study obtained 5-7 “Yes” answers; and “High” when the study reached 8 or more “Yes” answers.

| Cohort                         |    |    |    |    |    |    |    |    |    |     |     |       |          |
|--------------------------------|----|----|----|----|----|----|----|----|----|-----|-----|-------|----------|
| Study                          | Q1 | Q2 | Q3 | Q4 | Q5 | Q6 | Q7 | Q8 | Q9 | Q10 | Q11 | Total | Quality  |
| Kim, J.G., et al.; 2023        | Y  | Y  | Y  | Y  | Y  | NA | Y  | Y  | Y  | NA  | Y   | 9     | High     |
| Rosas-Salazar,C., et al., 2023 | Y  | Y  | Y  | N  | NA | NA | Y  | Y  | Y  | NA  | Y   | 7     | Moderate |
| Suskun, C. et al.              | Y  | Y  | Y  | N  | NA | NA | Y  | Y  | Y  | NA  | Y   | 7     | Moderate |

Note: It was categorized as “Low” when the study obtained up to 4 “Yes” answers for the evaluated items; “Moderate” when the study obtained 5-8 “Yes” answers; and “High” when the study reached 9 or more “Yes” answers.
