# Supplementary material for: Lactobacilli in COVID-19: A Systematic Review Based on Next-Generation Sequencing Studies
Source: Microorganisms. 2024 Jan 29;12(2):284. doi: 10.3390/microorganisms12020284 (PMC10891515; doi:10.3390/microorganisms12020284)
Supplement: Supplementary file 1 [file microorganisms-12-00284-s001.zip › Supplement S3.xlsx]

## Sheet: Planilha 1
Paper	Authors	Year	DOI	Revista	Type of study	Type of sample	Country	Reference databank	NGS Tecnology and type of sequencing	N	Groups	Outcome	Clinical relevance
The Gut Microbiota of Critically Ill Patients With COVID-19	Gaibani, P.; et al.	2021	10.3389/fcimb.2021.670424	Frontiers in Cellular and Infection Microbiology	Case-control	Stool	Italy	Greengenes.	MiSeq / V3-V4	138	69 COVID-19 patients 69 healthy controls (from databank)	Enriched	Associated with disease
Tongue coating microbiome composition reflects disease severity in patients with COVID-19 in Nanjing, China	Jiang, Z.; et al.	2023	10.1080/20002297.2023.2236429	Journal of Oral Microbiology	Cross-sectional	Tongue/Oral	China	SILVA 138	Novaseq 6000 PE250 / V3-V4	130	49 mild to moderate COVID-19 44 severe and critical COVID-19 37 healthy control	Greater abundance in severe-critical patients. Detected as a group biomarker	Associated with severity
The salivary and nasopharyngeal microbiomes are associated with SARS-CoV-2 infection and disease severity	Kim, J.G. et al.	2023	10.1002/jmv.28445	Journal of medical virology	Cohort	Saliva and nasopharyngeal	USA	RDB	MiSeq / V1-V2	NI	114 samples COVID-19 positive 30 samples COVID-19 negative	Depleted in oral samples and increased in nasopharyngeal samples from ICU patients	Associated with severity
Longitudinal alterations of the gut mycobiota and microbiota on COVID-19 severity	Maeda, Y.: et al.	2022	10.1186/s12879-022-07358-7	BMC Infectious Deseases	Case-control	Stool	Japan	Greengenes 13_8	MiSeq / V1-V2 e ITS1	108	38 mild COVID-19 40 severe COVID-19 10 patients with severe COVID-19 after discharge 30 healthy control	Characteristic of the severe group. Dominant relative abundance in some recovered patients.	Associated with disease severity and recovery process
Upper respiratory tract microbiota dynamics following COVID-19 in adults	Rosas-Salazar,C.; et al.	2023	10.1099/mgen.0.000957	Microbial Genomics	Cohort	URT	USA	SILVA 132	MiSeq / V4	48	24 mild-to-moderate COVID-19 patients 24 assymptomatic uninfected control	Differentially abundant. Decreased L. jensenii in COVID-19.	Associated with disease
Oral Microbiome Dysbiosis Is Associated With Symptoms Severity and Local Immune/Inflammatory Response in COVID-19 Patients: A Cross-Sectional Study	Soffritti, I.; et al.	2021	10.3389/fmicb.2021.687513	Frontiers in Microbiology	Cross-sectional	Oral	Italy	NI	Ion Gene Studio S5 / Shotgun	75	39 COVID-19 patients 36 controls	Increase relative abundance. Increase Lactobacillus fermentum.	Associated with disease
Intestinal microbiota composition of children with infection with severe acute respiratory syndrome coronavirus 2 (SARS-CoV-2) and multisystem inflammatory syndrome (MIS-C)	Suskun, C. et al.	2022	10.1007/s00431-022-04494-9	European Journal of Pediatrics	Cohort	Stool	Turkey	GreenGenes	NovaSeq6000 / V3-V4	39	20 COVID-19 19 healthy controls	Lactobacillus ruminis dominantin the control group.	Not associated with disease
Altered oral and gut microbiota and its association with SARS-CoV-2 viral load in COVID-19 patients during hospitalization	Wu, Y..J., et al.	2021	10.1038/s41522-021-00232-5	Biofilms and Microbiomes	Case-control	Throat and stool	China	Greengenes 13.8	NovaSeq 6000 / V3-V4	129	53 COVID-19 patients 76 healthy controls	Increased in fecal samples.	Associated with disease
Gut microbiota composition reflects disease severity and dysfunctional immune responses in patients with COVID-19	Yeoh, Y.K. et al.	2021	10.1136/gutjnl-2020-323020	Gut	Case-control	Stool	China	MetaPhlAn2 V.2.7.7	Novaseq 6000 / Shotgun	178	100 COVID-19 patients 78 non-COVID-19 patients	Enriched Lactobacillus ruminis in recovered patients.	Associated with recovery process
